# Supplementary material for: An in-plane switching liquid crystal cell with weakly anchored liquid crystals on the electrode substrate
Source: Royal Society of Chemistry journal article supplement (doi:10.1039/c6tc05465j), 2017-01-01
Supplement: c6tc05465j1.pdf [file c6tc05465j1.pdf]

## Electric Supplementary Information

# In-Plane Switching Liquid Crystal Cell with Weakly Anchored Liquid Crystals on the Electrode Substrate

Osamu Sato, Naoto Iwata, Joji Kawamura, Tsuyoshi Maeda, Yosinobu Tsujii, Junji Watanabe,  
Masatoshi Tokita\*

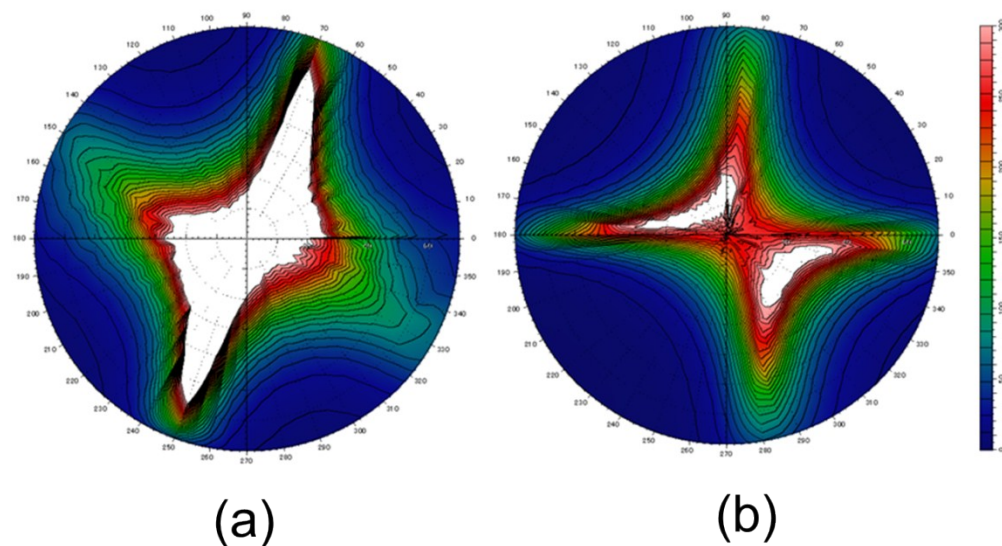

**Figure S1.** Contour map of the contrast ratio for the (a) type-I cell and (b) type-III cell. Regions with a contrast ratio above 300 are indicated in white. These maps reveal a difference of  $20^\circ$  in the symmetry of the high-contrast region between the type-I and type-II cells. This corresponds to the differences in the cross-Nicol and rubbing directions, which differ by just  $20^\circ$  between the type-I and type-II cells (FIG.1). The initial LC orientations of the type-I and type-III cells are at  $70^\circ$ – $250^\circ$  and  $90^\circ$ – $270^\circ$ , respectively.

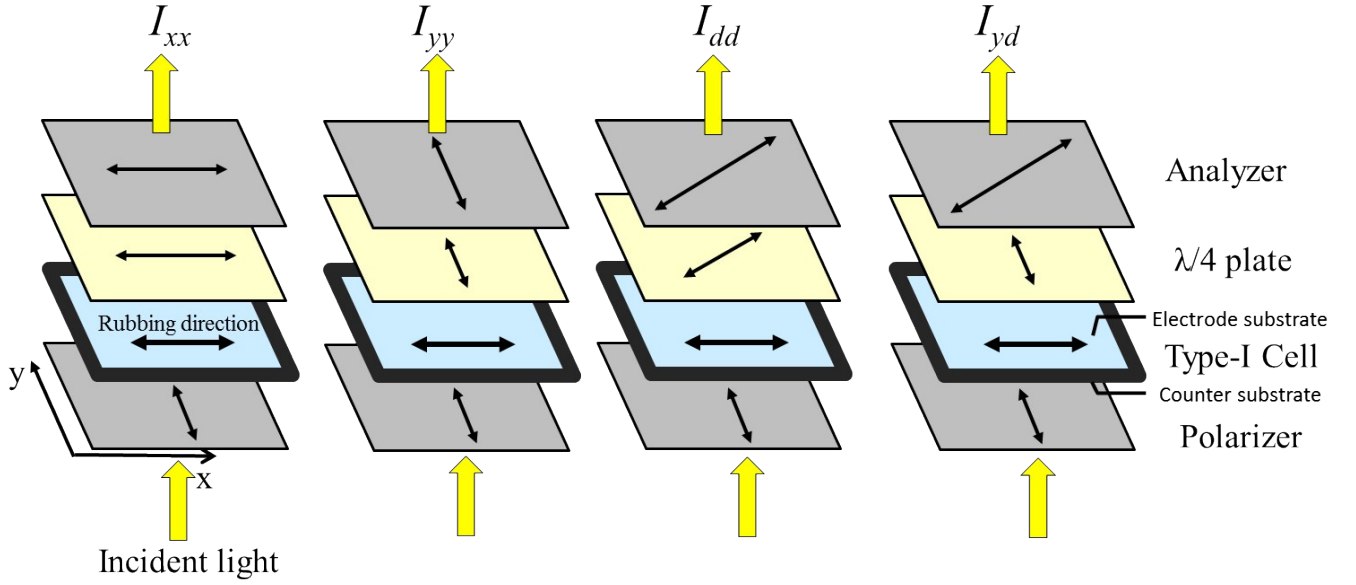

**Figure S2.** Optical setup for measuring the transmitted light intensities  $I_{xx}$ ,  $I_{yy}$ ,  $I_{dd}$ , and  $I_{yd}$ . The arrow on a  $\lambda/4$  plate indicates the first axis direction. The type-I LC cell is set with the counter-substrate side facing the polarizer.

### Characterization of JC-5051 (nematic LC) at 25 °C

Refractive indices  $n_e = 1.5696$ ,  $n_o = 1.4886$ .

Relative permittivities  $\epsilon_{//} = 8.4$ ,  $\epsilon_{\perp} = 3.7$ .

Elastic constants  $K_{11} = 10.1$  pN,  $K_{22} = 12.8$  pN,  $K_{33} = 28.2$  pN.

Rotational viscosity  $\gamma = 0.1$  Pa s.
